# Supplementary material for: Hidden vulnerability of US Atlantic coast to sea-level rise due to vertical land motion
Source: PubMed Central journal article supplement (PMC10090057; doi:10.1038/s41467-023-37853-7), 2023-04-11
Supplement: 41467_2023_37853_MOESM1_ESM.pdf [file 41467_2023_37853_MOESM1_ESM.pdf]

**Supplementary Materials for**  
**Hidden Vulnerability of US Atlantic Coast to Sea-level Rise due to Vertical**  
**Land Motion**

Leonard O. Ohenhen\*, Manoochehr Shirzaei, Chandrakanta Ojha, Matthew L. Kirwan

\*Corresponding author. Email: [ohleonard@vt.edu](mailto:ohleonard@vt.edu)

**This PDF file includes:**

Supplementary Figs. 1 to 11  
Supplementary Tables 1 to 3

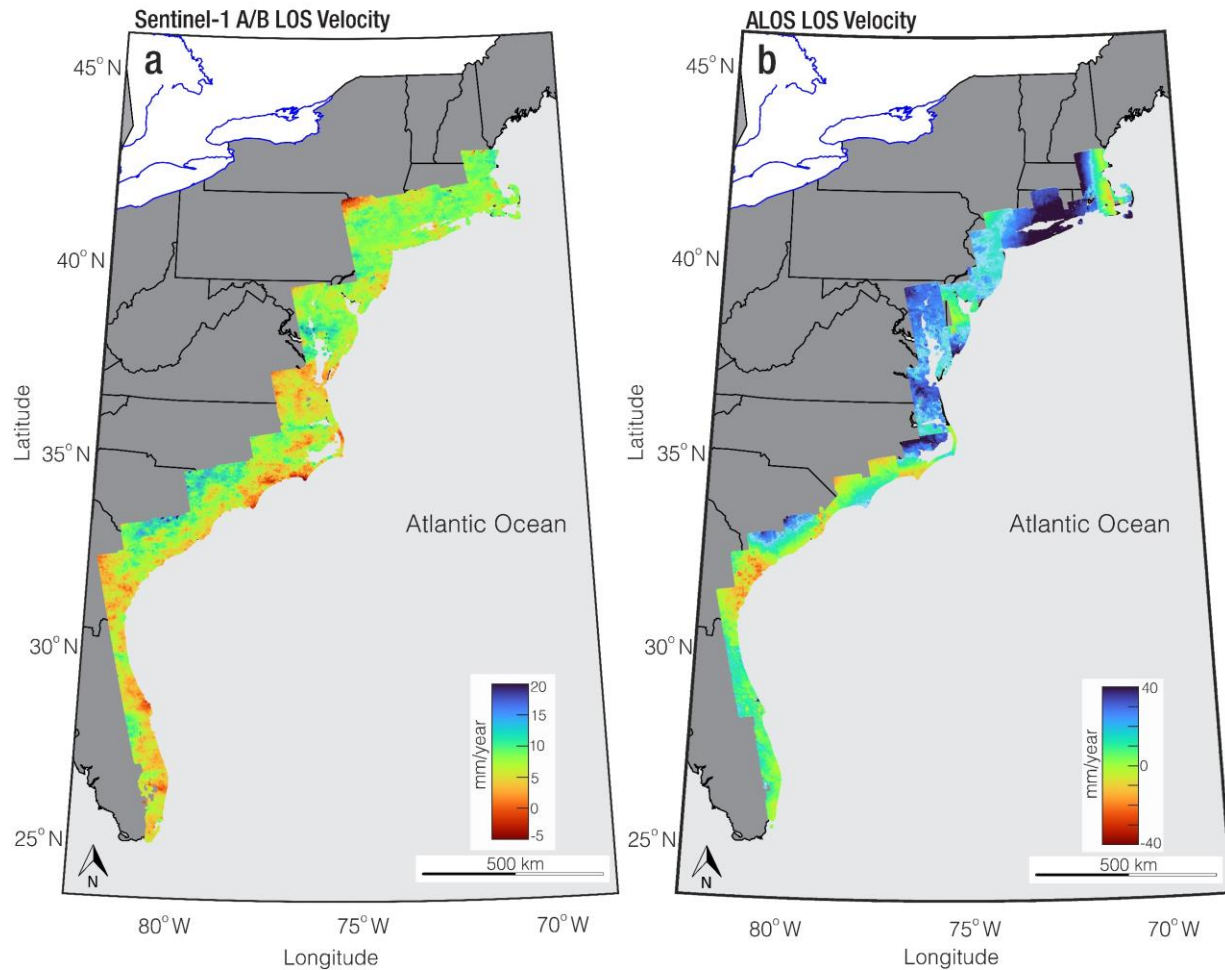

**Fig. 1. Line of sight (LOS) deformation map.** (a) LOS velocity obtained along the U.S. Atlantic Coast from Sentinel-1 C-band datasets in ascending viewing geometry during 2015 – 2020. (b) LOS velocity obtained along the U.S. Atlantic Coast from advanced land observing satellite (ALOS) L-band datasets in ascending viewing geometry during 2007 – 2011. Positive (negative) values denote movement towards (away from) the satellite. Supplementary table 1 summarizes the path and frame parameters of the SAR datasets. National, state, and great lakes boundaries in (a) and (b) are based on public domain vector map data by World DataBank (<https://data.worldbank.org/>) generated in MATLAB.

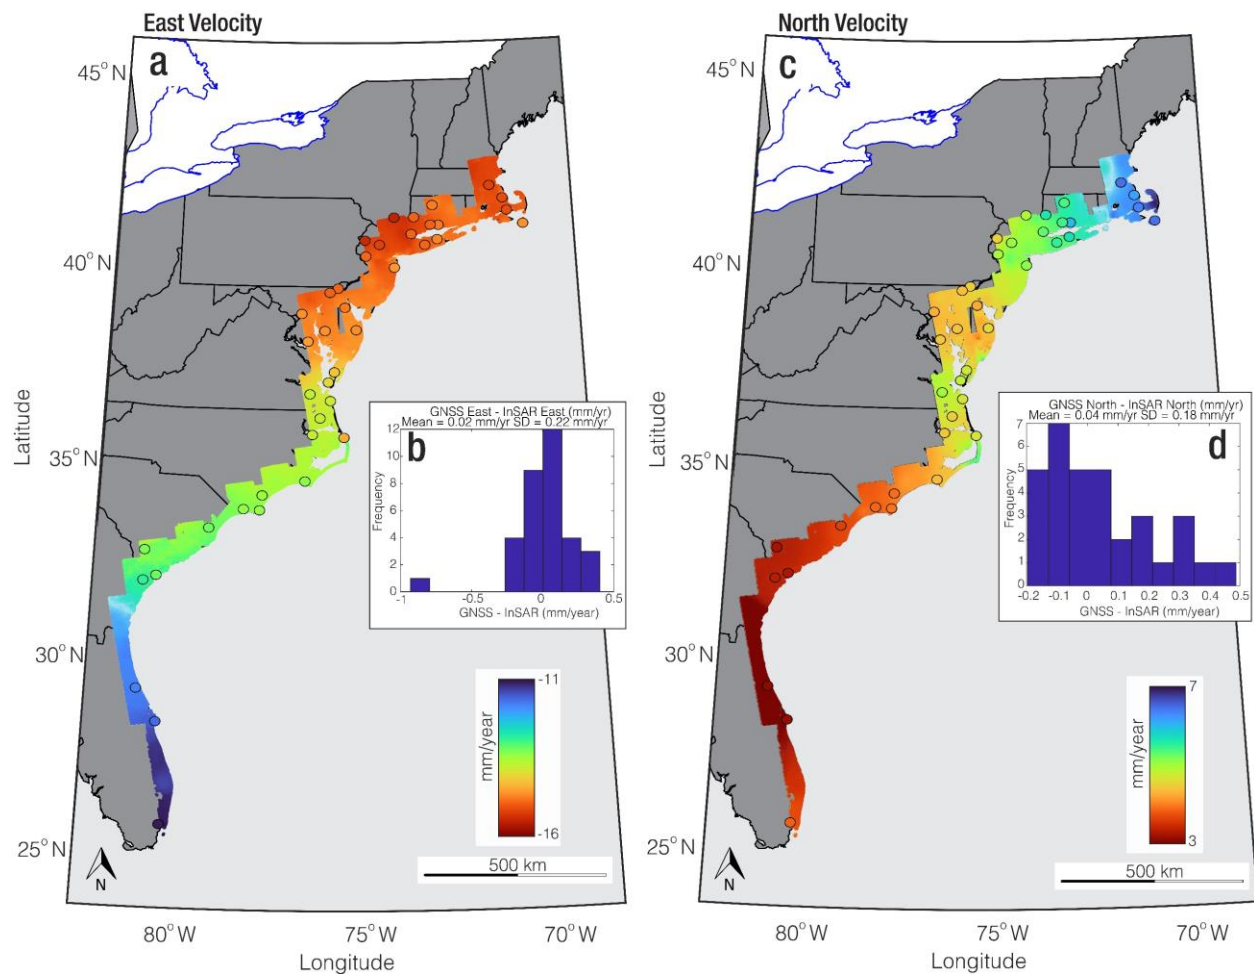

**Fig. 2. Horizontal velocities across the US Atlantic coast.** (a) Estimated east velocity. The circles show the location of GNSS validation observations color-coded with their respective east velocities. (b) Histogram comparing GNSS east rates with estimated east velocity. The standard deviation (SD) of the difference between the two datasets is 0.22 mm per year. (c) Estimated north velocity. The circles show the location of GNSS validation observations color-coded with their respective north velocities. (d) Histogram comparing GNSS north rates with estimated north velocity. The standard deviation (SD) of the difference between the two datasets is 0.18 mm per year. National, state, and great lakes boundaries in (a) and (c) are based on public domain vector map data by World DataBank (<https://data.worldbank.org/>) generated in MATLAB.

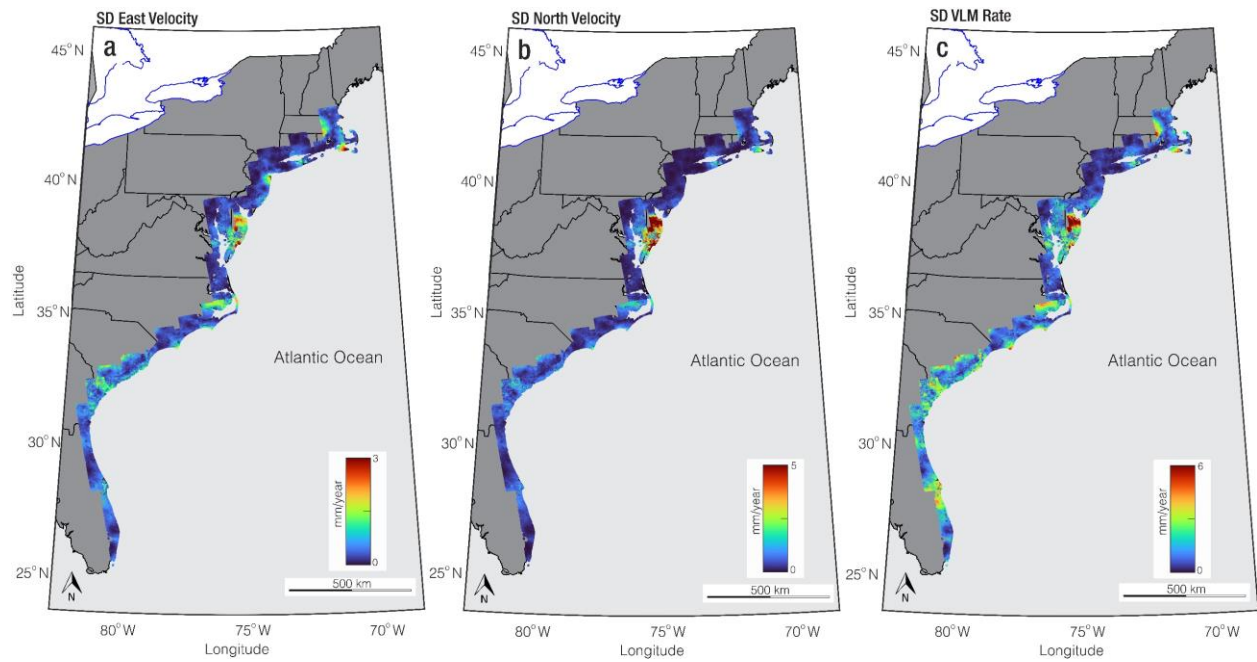

**Fig. 3. 3D velocity standard deviation (SD) distribution maps.** (a) east, (b) north, and (c) up. The units for the rate scale are mm per year. National, state, and great lakes boundaries in (a), (b), and (c) are based on public domain vector map data by World DataBank (<https://data.worldbank.org/>) generated in MATLAB.

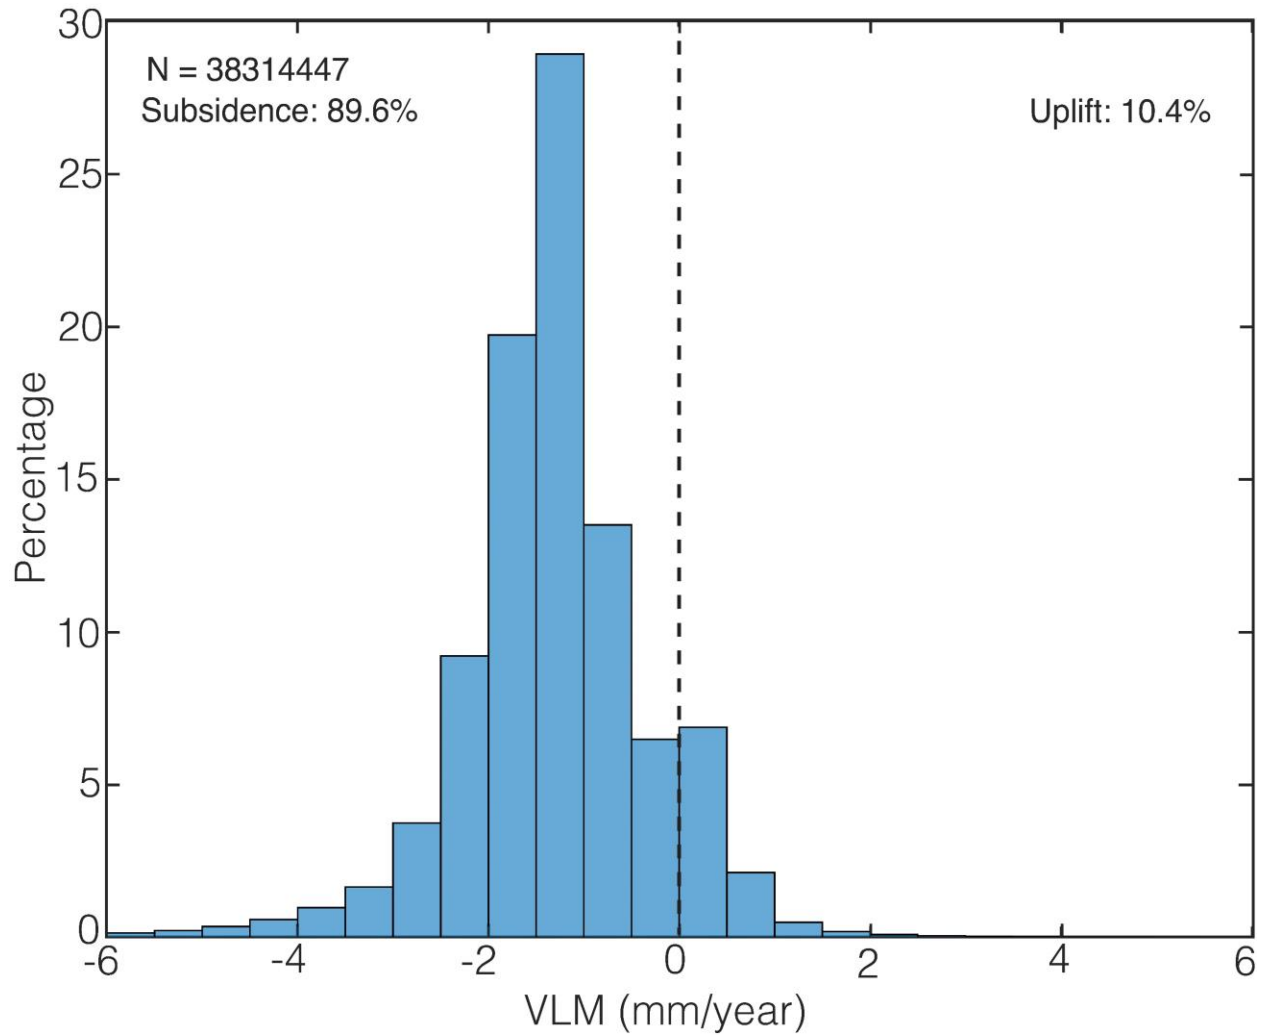

**Fig. 4. Distribution of Vertical land motion (VLM).** Histogram showing the distribution of VLM rate (mm per year). VLM rate  $< 0$  indicates subsidence, while VLM rate  $\geq 0$  indicates uplift. N is the number of pixels.

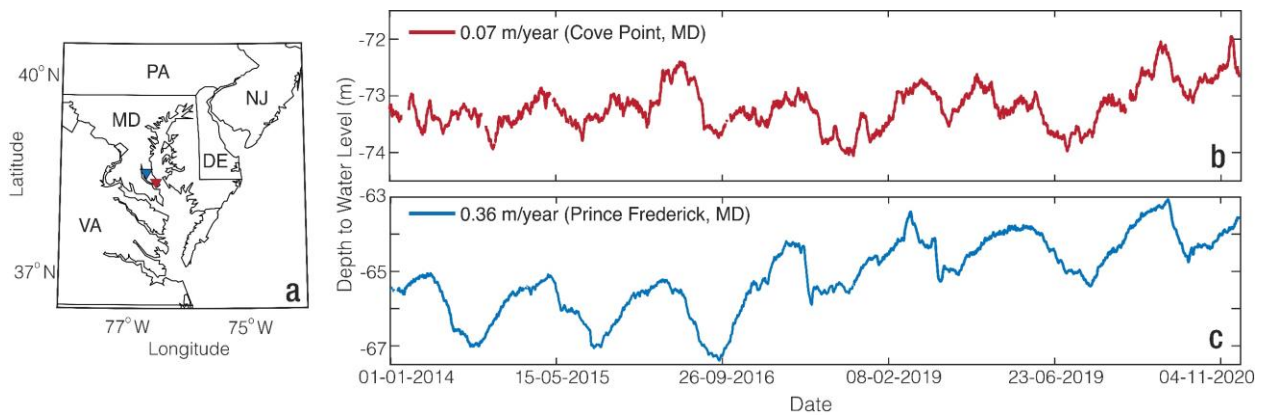

**Fig. 5. Groundwater level during 2014 – 2020 in the Chesapeake Bay area.** (a) Map of Chesapeake Bay area showing the well locations. The inverted triangle shows the location of the wells shown in B and C. The red triangle is well in Cove Point, Maryland (MD) shown in B, and the blue triangle is well in Prince Frederick Point, MD shown in C. (b) Depth to water level for well station at Cove Point, MD. The linear rate is 0.07 m per year. (c) Depth to water level for well station at Prince Frederick Point, MD. The linear rate is 0.36 m per year. The groundwater data is from the United States Geological Survey (USGS) groundwater data for the nation<sup>55</sup>. National and state boundaries in (a) are based on public domain vector map data by World DataBank (<https://data.worldbank.org/>) generated in MATLAB.

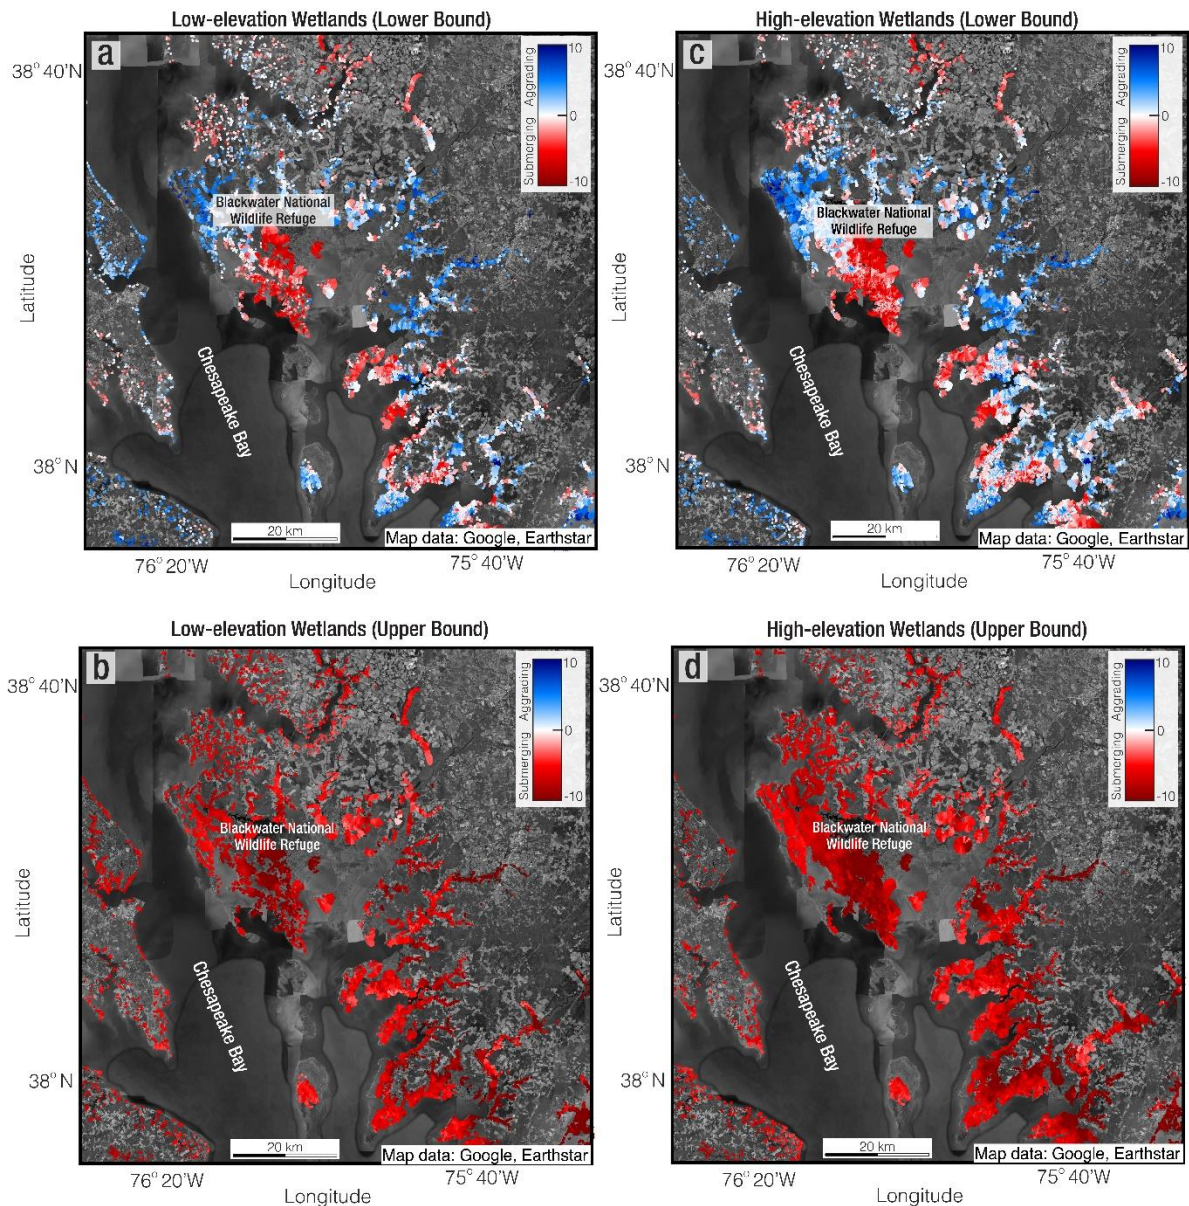

**Fig. 6. Wetland vulnerability for the Chesapeake Bay area.** (a) Lower bound of vertical resilience (VR) for low-elevation wetlands. (Background Image: Google, Earthstar). (b) Upper bound of VR for low-elevation wetlands. (Background Image: Google, Earthstar). (c) Lower bound of VR for high-elevation wetlands. (Background Image: Google, Earthstar). (d) Upper bound of VR for high-elevation wetlands. (Background Image: Google, Earthstar). VR is calculated as vertical land motion (VLM) minus sea level rise. The upper bounds and lower bounds are calculated as  $\pm 2SD$ . Red colors indicate submerging wetlands ( $VR < -0.5$  mm per year), blues indicate aggrading wetlands ( $VR > 0.5$  mm per year), and whites indicate maintaining wetlands ( $-0.5$  mm per year  $\leq VR \leq 0.5$  mm per year).

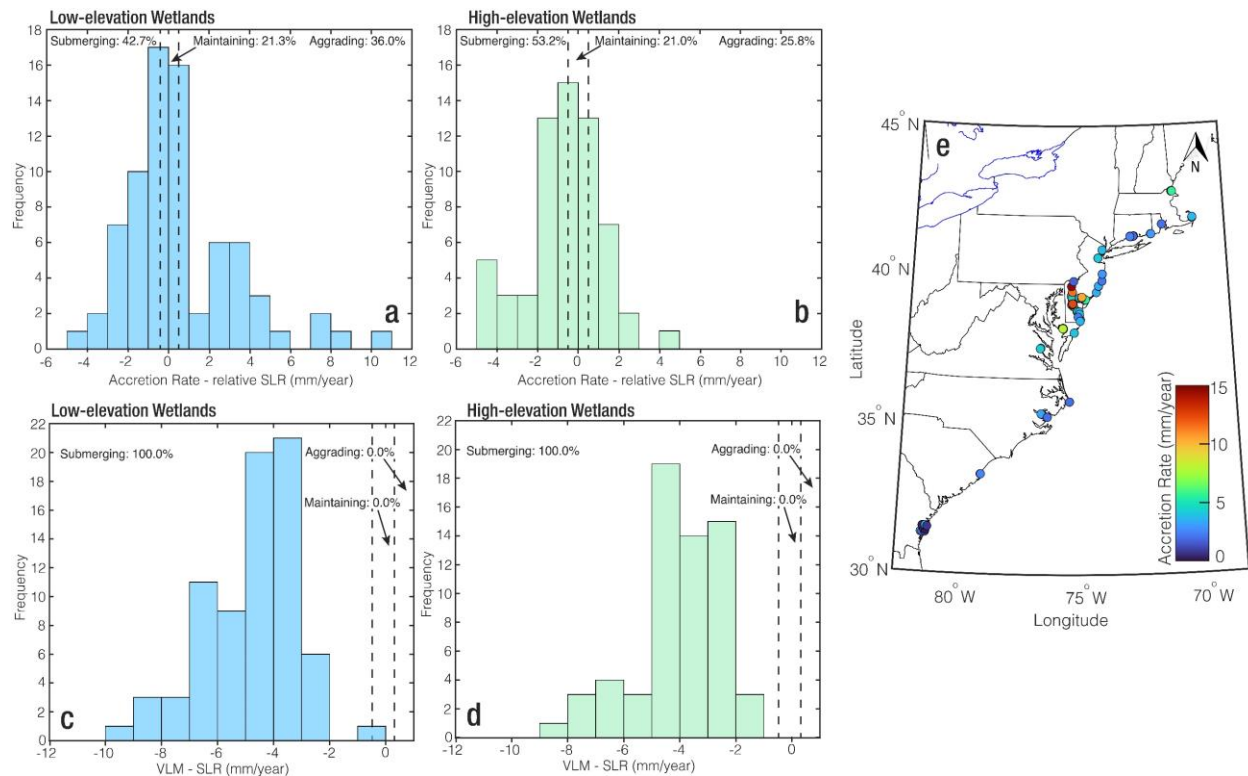

**Fig. 7. Point estimates of wetland vulnerability across the US Atlantic coast.** (a) Vertical resilience (VR) for low-elevation wetlands calculated as accretion rate minus relative sea-level rise (SLR). (b) VR for high-elevation wetlands calculated as accretion rate minus relative SLR. (c) VR for low-elevation wetlands calculated as vertical land motion (VLM) rate minus SLR. (d) VR for low-elevation wetlands calculated as VLM rate minus SLR. VR values less than -0.5 mm per year indicate submerging wetlands, VR values greater than 0.5 mm per year indicates aggrading wetlands, and VR values between -0.5 mm per year and 0.5 mm per year represent maintaining wetlands. (e) Accretion rate across the US Atlantic coast compiled from Kirwan *et al.*<sup>38</sup> and Holmquist *et al.*<sup>64</sup>. National, state, and great lakes boundaries in (e) are based on public domain vector map data by World DataBank (<https://data.worldbank.org/>) generated in MATLAB.



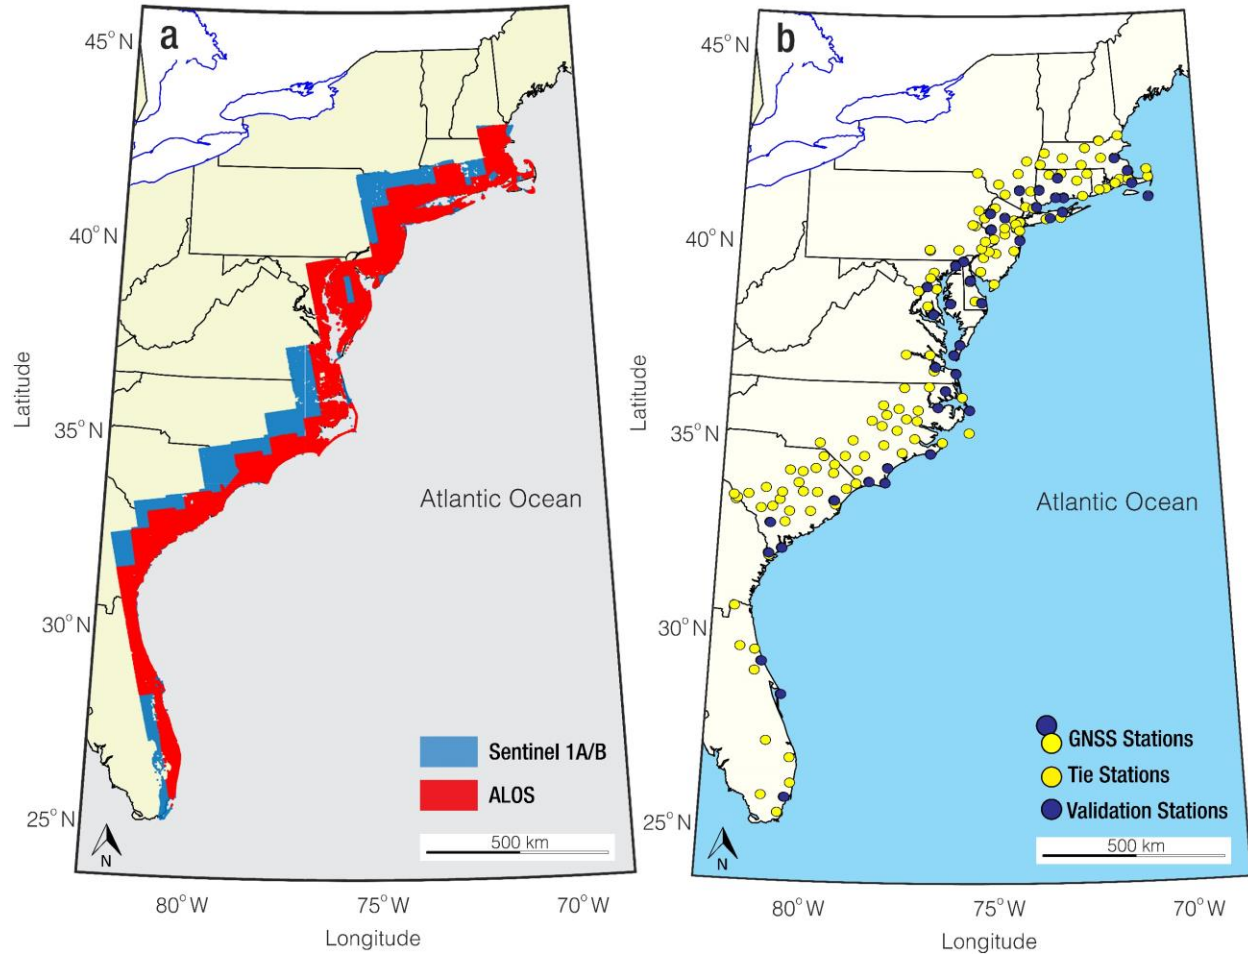

**Fig. 8. Synthetic Aperture Radar (SAR) and global navigation satellite system (GNSS) datasets.** (a) The final location of SAR pixels after transformation to a global reference frame. The blue colors indicate the locations of Sentinel-1 pixels. The red colors indicate the locations of ALOS pixels. (b) Locations of GNSS stations used in the study. The yellow circles are the locations of 132 GNSS tie stations used in the study. The blue circles are the locations of 41 GNSS stations used in validation. National, state, and great lakes boundaries in (a) and (b) are based on public domain vector map data by World DataBank (<https://data.worldbank.org/>) generated in MATLAB.

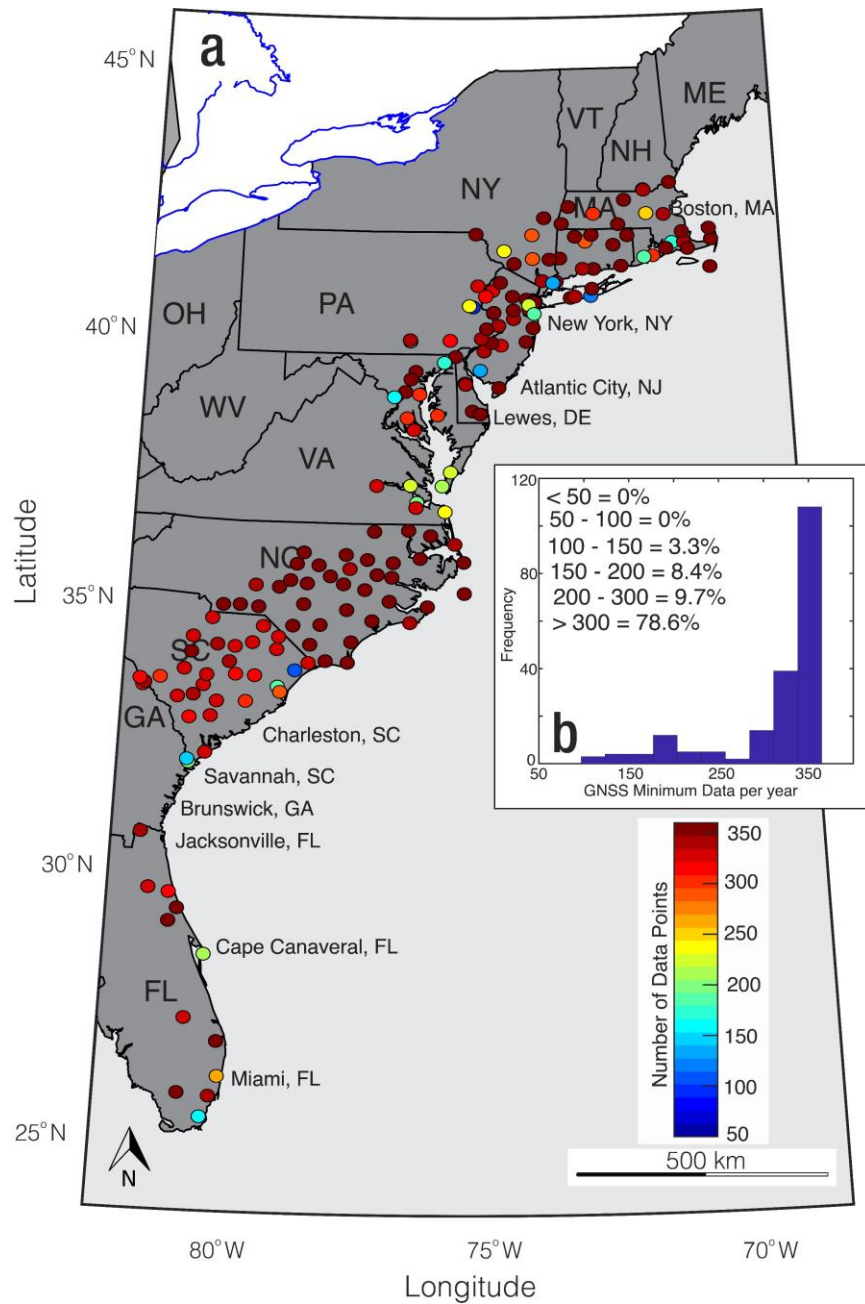

**Fig. 9. Minimum yearly global navigation satellite system (GNSS) samples. (a) Distribution of the minimum number of samples per year for each GNSS station. (b) Histogram showing the distribution of minimum yearly samples for each GNSS station.** National, state, and great lakes boundaries in (a) are based on public domain vector map data by World DataBank (<https://data.worldbank.org/>) generated in MATLAB.

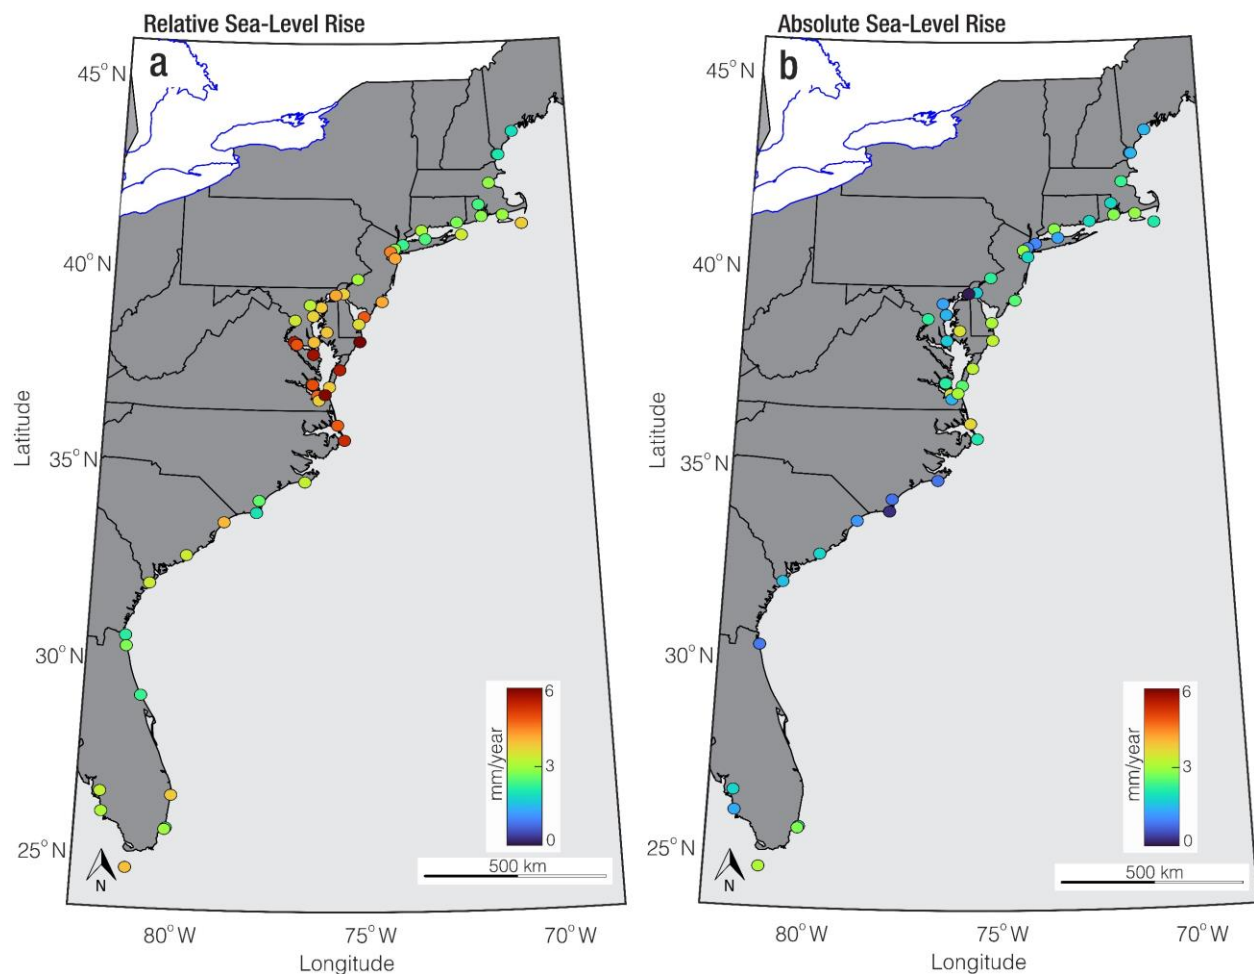

**Fig. 10. Sea-level rise (SLR) from tide gauges across the US Atlantic coast. (a) Relative SLR<sup>99</sup>. (b) Absolute SLR corrected for Vertical land motion using the median up velocity of GNSS stations. National, state, and great lakes boundaries in (a) and (b) are based on public domain vector map data by World DataBank (<https://data.worldbank.org/>) generated in MATLAB.**

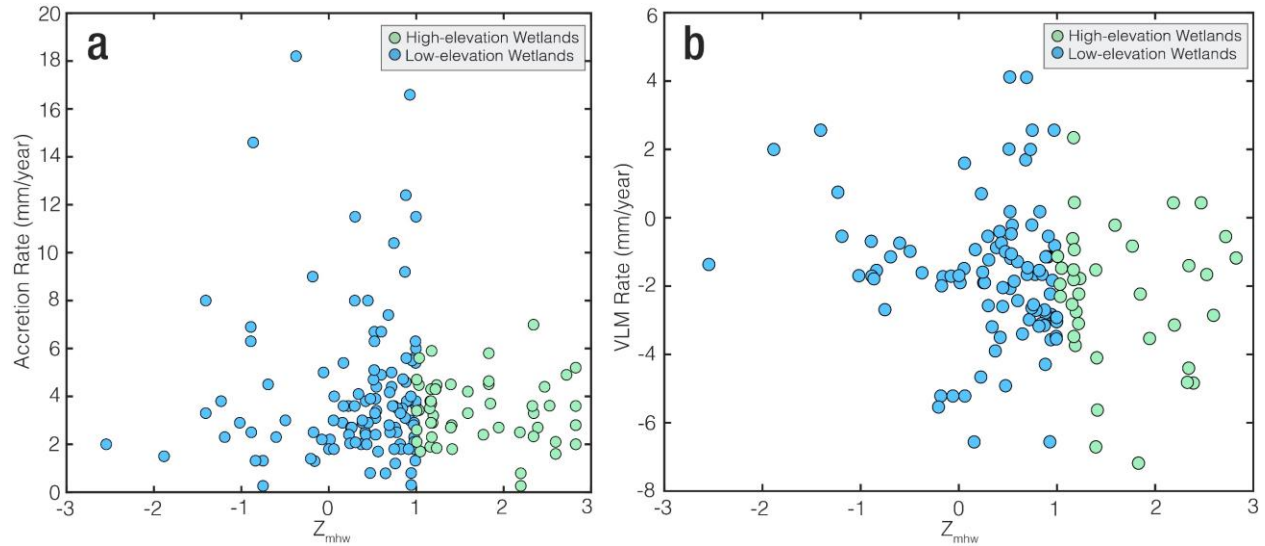

**Fig. 11. Elevation normalized to mean high water ( $Z_{MHW}$ ) for point accretion data across the US Atlantic coast.** (a) Plot of accretion rate in mm per year versus  $Z_{mhw}$  for point accretion data shown in Supplementary Fig. 7e. (b) Plot of vertical land motion (VLM) rate in mm per year versus  $Z_{mhw}$ . VLM rates were extracted for each point with measurements of accretion rate. The blue symbols are low-elevation wetlands with  $Z_{mhw}$  less than 1, and the green symbols are high-elevation wetlands with  $Z_{mhw}$  greater than or equal to 1.

**Table 1. Synthetic Aperture Radar datasets used in the analysis.**

| <b>Sentinel-1A/B</b> |             |               | <b>ALOS</b>  |             |                  | <b>ALOS</b>  |             |                         |
|----------------------|-------------|---------------|--------------|-------------|------------------|--------------|-------------|-------------------------|
| <b>Orbit</b>         | <b>Path</b> | <b>Frames</b> | <b>Orbit</b> | <b>Path</b> | <b>Frames</b>    | <b>Orbit</b> | <b>Path</b> | <b>Frames</b>           |
| Ascending            | 48          | 79            | Ascending    | 116         | 880, 890         | Ascending    | 133         | 770, 780                |
| Ascending            | 48          | 84            | Ascending    | 117         | 880, 890         | Ascending    | 134         | 750 - 780               |
| Ascending            | 48          | 89            | Ascending    | 118         | 880              | Ascending    | 135         | 740, 750, 780           |
| Ascending            | 48          | 94            | Ascending    | 119         | 870, 880         | Ascending    | 136         | 690 - 780               |
| Ascending            | 48          | 99            | Ascending    | 120         | 870, 880         | Ascending    | 137         | 690 - 770               |
| Ascending            | 150         | 102           | Ascending    | 121         | 870              | Ascending    | 138         | 680, 690                |
| Ascending            | 77          | 107           | Ascending    | 122         | 860 - 870        | Ascending    | 139         | 680                     |
| Ascending            | 4           | 110           | Ascending    | 123         | 820, 830,<br>860 | Ascending    | 140         | 680                     |
| Ascending            | 4           | 115           | Ascending    | 124         | 820 - 860        | Ascending    | 141         | 670                     |
| Ascending            | 106         | 118           | Ascending    | 125         | 820 - 840        | Ascending    | 142         | 660, 670                |
| Ascending            | 106         | 123           | Ascending    | 126         | 820              | Ascending    | 143         | 660                     |
| Ascending            | 33          | 125           | Ascending    | 127         | 810, 820         | Ascending    | 144         | 650                     |
| Ascending            | 33          | 130           | Ascending    | 128         | 810, 820         | Ascending    | 145         | 640, 650                |
| Ascending            | 135         | 131           | Ascending    | 129         | 800, 810         | Ascending    | 146         | 640                     |
| Ascending            | 62          | 133           | Ascending    | 130         | 800, 810         | Ascending    | 147         | 630, 640                |
| Ascending            | 62          | 138           | Ascending    | 131         | 800, 810         | Ascending    | 148         | 500 - 560,<br>610 - 630 |
| Ascending            | 164         | 142           | Ascending    | 132         | 780 - 800        | Ascending    | 149         | 560 - 610               |

**Table 2. Comparison of IPCC vertical land motion (VLM) rate<sup>56,57</sup> (mm per year) with InSAR VLM rate from this study (mm per year).** Note that a negative VLM (or subsidence) in a positive sea level change. The percent (%) difference is calculated as:  $\frac{IPCC\ VLM - InSAR\ VLM}{(IPCC\ VLM + InSAR\ VLM)/2} \times 100\%$ . A negative % difference indicates underestimation and a positive difference indicates overestimation, with a  $\pm 20\%$  error buffer.

| <b>Tide Gauge Station</b> | <b>IPCC VLM Rate<br/>(mm per year)</b> | <b>VLM Rate from this<br/>Study (mm per year)</b> | <b>%<br/>Difference</b> |
|---------------------------|----------------------------------------|---------------------------------------------------|-------------------------|
| Boston, MA                | -1.1±0.2                               | -1.0±0.1                                          | 9.5                     |
| Woods Hole, MA            | -1.4±0.2                               | -2.0±0.1                                          | -35.3                   |
| Bridgeport, CT            | -1.2±0.2                               | -1.2±0.1                                          | 0.0                     |
| Atlantic City, NJ         | -2.4±0.2                               | -3.1±0.2                                          | -25.5                   |
| Cape May, NJ              | -2.0±0.2                               | -3.5±0.3                                          | -54.5                   |
| Lewes, DE                 | -2.3±0.2                               | -2.7±0.7                                          | -16.0                   |
| Sewells Point, VA         | -2.9±0.2                               | -2.2                                              | 27.5                    |
| Beaufort, NC              | -1.6±0.4                               | -2.2±0.2                                          | -31.6                   |
| Wilmington, NC            | -1.0±0.3                               | -1.6±0.3                                          | -46.2                   |
| Charleston I, SC          | -1.7±0.2                               | -3.0±0.5                                          | -55.3                   |
| Trident Pier, FL          | -0.8±0.4                               | -1.8±0.1                                          | -76.9                   |
| Miami Beach, FL           | -1.1±0.4                               | -0.9±0.4                                          | 20.0                    |

**Table 3. Comparison of SET-MH elevation change rate<sup>45</sup> (mm per year) with InSAR vertical land motion (VLM) rate (mm per year).**

| <b>Longitude</b> | <b>Latitude</b> | <b>Elevation Change Rate (mm per year)</b> | <b>InSAR VLM (mm per year)</b> |
|------------------|-----------------|--------------------------------------------|--------------------------------|
| -81.2183         | 29.6290         | -0.133                                     | -0.163                         |
| -81.2880         | 29.7715         | 1.461                                      | 0.822                          |
